# Supplementary material for: Colorectal Cancer Screening Programs in Latin America: A Systematic Review and Meta-Analysis
Source: PubMed Central journal article supplement (PMC10835514; doi:10.1001/jamanetworkopen.2023.54256), 2024-02-01
Supplement: jamanetwopen-e2354256-s002.pdf [file jamanetwopen-e2354256-s002.pdf]

## **Data Sharing Statement**

Montalvan-Sanchez. Colorectal Cancer Screening Programs in Latin America. *JAMA Netw Open*. Published February 01, 2024. doi:10.1001/jamanetworkopen.2023.54256

### **Data**

**Data available:** No
